# Supplementary material for: Detection and Degradation Characterization of 16 Quinolones in Soybean Sprouts by Ultra-High Performance Liquid Chromatography-Tandem Mass Spectrometry
Source: MDPI journal article supplement (doi:10.3390/foods11162500), 2022-08-18
Supplement: s1 [file s1]

Table S1. MS parameters of 16 Quinolones

| Compound         | Time/<br>min | Parent ion<br>mass to<br>charge<br>ratio/(m/z) | Quantitative<br>mass to charge<br>ratio/(m/z) | Qualitative<br>mass to charge<br>ratio/(m/z) | Collision<br>energy/V | Debunching<br>voltage/V | Internal standard |
|------------------|--------------|------------------------------------------------|-----------------------------------------------|----------------------------------------------|-----------------------|-------------------------|-------------------|
| Enrofloxacin     | 3.39         | 360.3                                          | 316.2                                         | 245.1                                        | 24/36                 | 100                     | Enrofloxacin-D5   |
| Ciprofloxacin    | 3.28         | 332.2                                          | 314.1                                         | 231.0                                        | 30/30                 | 100                     | Ciprofloxacin-D8  |
| Ofloxacin        | 3.25         | 362.2                                          | 318.1                                         | 261.1                                        | 26/38                 | 100                     | Norfloxacin-D5    |
| Norfloxacin      | 3.23         | 320.2                                          | 302.2                                         | 233.1                                        | 35/33                 | 100                     | Norfloxacin-D5    |
| Pefloxacin       | 3.27         | 334.3                                          | 316.1                                         | 290.0                                        | 26/24                 | 108                     | Norfloxacin-D5    |
| Lomefloxacin     | 3.34         | 352.2                                          | 265.1                                         | 334.1                                        | 32/30                 | 100                     | Ciprofloxacin-D8  |
| Dalfloxacin      | 3.32         | 358.2                                          | 340.1                                         | 255.0                                        | 31/53                 | 110                     | Ciprofloxacin-D8  |
| Sarafloxacin     | 3.55         | 386.2                                          | 299.0                                         | 368.2                                        | 28/31                 | 115                     | Enrofloxacin-D5   |
| Flurofloxacin    | 3.27         | 370.2                                          | 326.1                                         | 269.0                                        | 24/38                 | 100                     | Norfloxacin-D5    |
| Difluoxacin      | 3.57         | 400.2                                          | 356.2                                         | 382.1                                        | 39/31                 | 110                     | Ciprofloxacin-D8  |
| Sparfloxacin     | 3.55         | 393.2                                          | 349.2                                         | 292.0                                        | 26/35                 | 120                     | Enrofloxacin-D5   |
| Enoxacin         | 3.23         | 320.2                                          | 302.1                                         | 233.1                                        | 24/34                 | 100                     | Norfloxacin-D5    |
| Nalidixic acid   | 4.39         | 233.1                                          | 215.0                                         | 187.1                                        | 18/34                 | 60                      | Enrofloxacin-D5   |
| Oxalic acid      | 3.99         | 262.1                                          | 244.1                                         | 160.1                                        | 23/47                 | 80                      | Enrofloxacin-D5   |
| Flumequine       | 4.44         | 262.2                                          | 244.0                                         | 202.1                                        | 23/25                 | 80                      | Enrofloxacin-D5   |
| Orbifloxacin     | 3.43         | 396.2                                          | 295.1                                         | 352.0                                        | 34/24                 | 103                     | Ciprofloxacin-D8  |
| Ciprofloxacin-D8 | 3.27         | 340.3                                          | 322.1                                         | ---                                          | 28                    | 50                      | ---               |
| Enrofloxacin-D5  | 3.39         | 365.1                                          | 321.1                                         | ---                                          | 26                    | 50                      | ---               |
| Norfloxacin-D5   | 3.23         | 325.3                                          | 307.2                                         | ---                                          | 42                    | 110                     | ---               |

Note: --- means no internal standard.

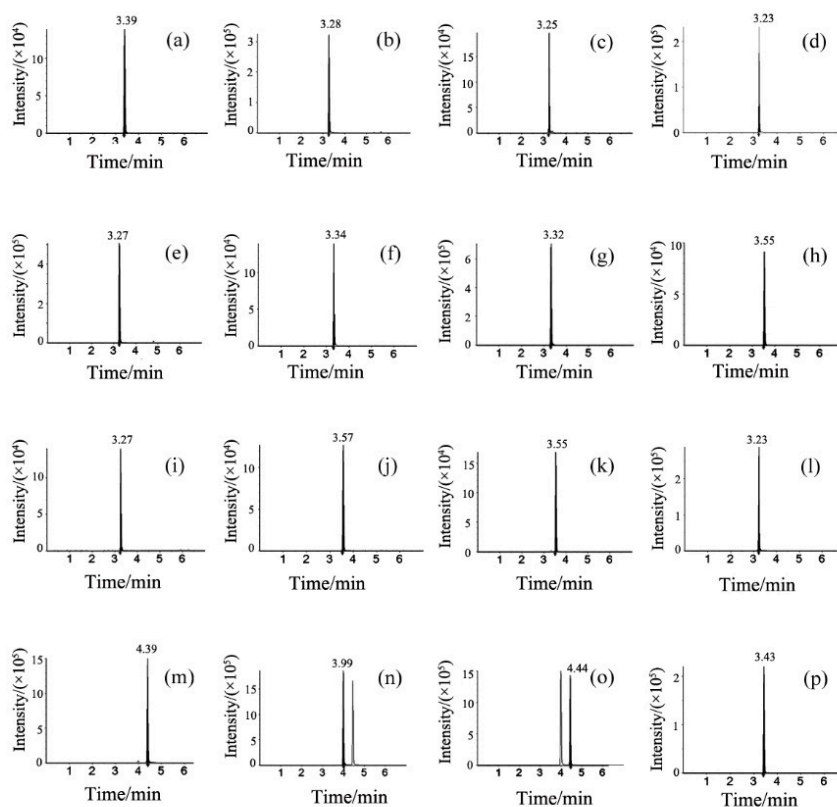

Figure S1. The 16 quinolones of MRM chromatogram

(a)-Enrofloxacin; (b)-Ciprofloxacin; (c)-Ofloxacin; (d)-Norfloxacin; (e)-Pefloxacin; (f)-Lomefloxacin; (g)-Dalfloxacin; (h)-Sarafloxacin; (i)-Flurofloxacin; (j)-Difluoxacin; (k)-Sparfloxacin; (l)-Enoxacin; (m)-Nalidixic acid; (n)-Oxalic acid; (o)-Flumequine; (p)-Orbifloxacin

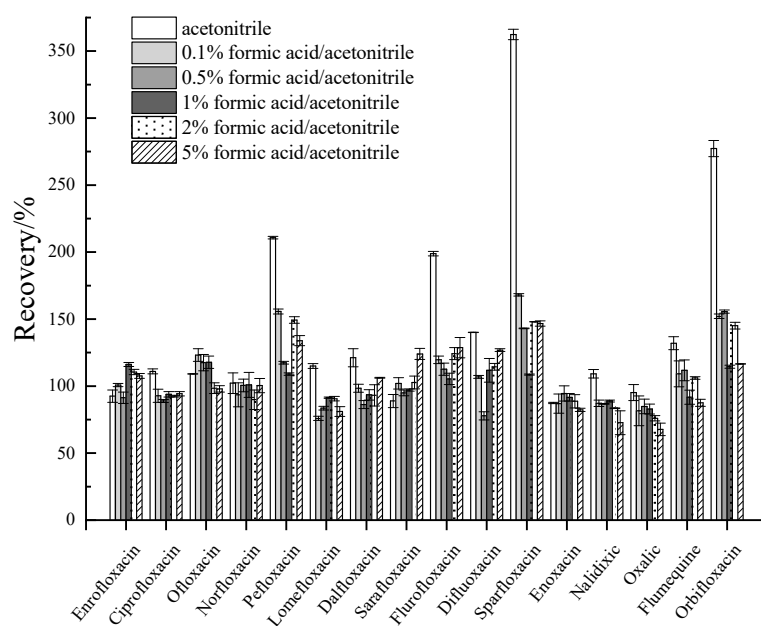

**Figure S2.** The effect of extraction solvents on the recoveries of 16 quinolones

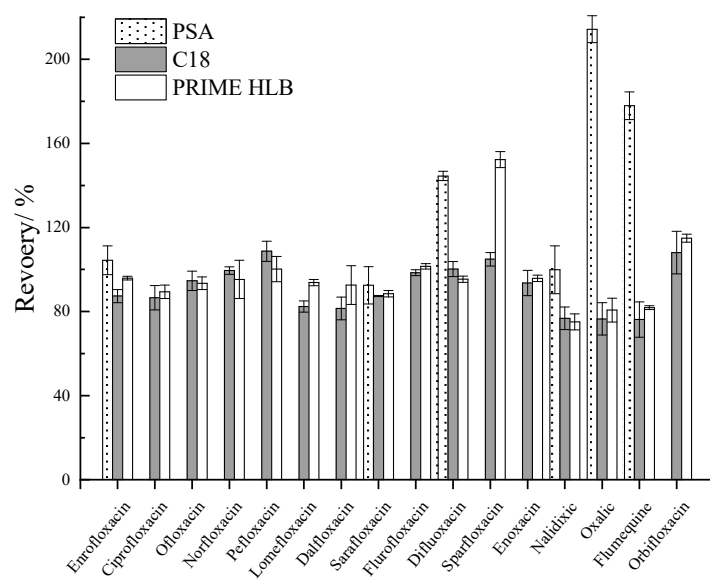

**Figure S3.** The effect of purification of column on the recoveries of 16 quinolones
